# Supplementary material for: External Validation of Prediction Models for Pneumonia in Primary Care Patients with Lower Respiratory Tract Infection: An Individual Patient Data Meta-Analysis
Source: PubMed Central journal article supplement (PMC4769284; doi:10.1371/journal.pone.0149895), 2016-02-26
Supplement: pone.0149895.s001.pdf [file pone.0149895.s001.pdf]

**S1 Checklist.** TRIPOD Checklist for prediction model development and validation with added text excerpts. Some of the items were not applicable (NA) to the current study.

| Section/Topic             | Item | Checklist Item | Page                                                                                                                                                                                             | Text Excerpt |                                                                                                                                                                                                                                                                                                                                                                                                                                                                                                                                                                                                                                                                   |
|---------------------------|------|----------------|--------------------------------------------------------------------------------------------------------------------------------------------------------------------------------------------------|--------------|-------------------------------------------------------------------------------------------------------------------------------------------------------------------------------------------------------------------------------------------------------------------------------------------------------------------------------------------------------------------------------------------------------------------------------------------------------------------------------------------------------------------------------------------------------------------------------------------------------------------------------------------------------------------|
| <b>Title and abstract</b> |      |                |                                                                                                                                                                                                  |              |                                                                                                                                                                                                                                                                                                                                                                                                                                                                                                                                                                                                                                                                   |
| Title                     | 1    | D;V            | Identify the study as developing and/or validating a multivariable prediction model, the target population, and the outcome to be predicted.                                                     | 1            | "External Validation of Prediction Models for Pneumonia in Primary Care Patients with Lower Respiratory Tract Infection: An Individual Patient Data Meta-Analysis"                                                                                                                                                                                                                                                                                                                                                                                                                                                                                                |
| Abstract                  | 2    | D;V            | Provide a summary of objectives, study design, setting, participants, sample size, predictors, outcome, statistical analysis, results, and conclusions.                                          | 4            | OBJECTIVE/ STUDY DESIGN/ SETTING/ PARTICIPANTS/ OUTCOME: "In this study all published S&S models for prediction of pneumonia in primary care were externally validated in the individual patient data (IPD) of previously performed diagnostic studies."<br>SAMPLE SIZE: "N total=5308"<br>PREDICTORS: Not in abstract due to large number of predictors (page 9/10: "The prediction models included [...] one model [Table 1 and S3 Table]").<br>STATISTICAL ANALYSIS: "Models were assessed [...] average dataset performance."<br>RESULTS: "Prediction models by [...] lacked such correspondence."<br>CONCLUSIONS: "The model by [...] for primary care use." |
| <b>Introduction</b>       |      |                |                                                                                                                                                                                                  |              |                                                                                                                                                                                                                                                                                                                                                                                                                                                                                                                                                                                                                                                                   |
| Background and objectives | 3a   | D;V            | Explain the medical context (including whether diagnostic or prognostic) and rationale for developing or validating the multivariable prediction model, including references to existing models. | 6/7          | "Pneumonia is a major cause [...]and recently developed models."                                                                                                                                                                                                                                                                                                                                                                                                                                                                                                                                                                                                  |
|                           | 3b   | D;V            | Specify the objectives, including whether the study describes the development or validation of the model or both.                                                                                | 7            | "Therefore, a meta-analysis using individual patient data (IPD) from multiple studies was performed in order to extensively validate and compare the performance of all published S&S models for the diagnosis of pneumonia in primary care."                                                                                                                                                                                                                                                                                                                                                                                                                     |
| <b>Methods</b>            |      |                |                                                                                                                                                                                                  |              |                                                                                                                                                                                                                                                                                                                                                                                                                                                                                                                                                                                                                                                                   |
| Source of data            | 4a   | D;V            | Describe the study design or source of data (e.g., randomized trial, cohort, or registry data), separately for the development and validation data sets, if applicable.                          | 7/8          | "IPD for model validation [...] the Cochrane Library (S1 Appendix)."                                                                                                                                                                                                                                                                                                                                                                                                                                                                                                                                                                                              |
|                           | 4b   | D;V            | Specify the key study dates, including start of accrual; end of accrual; and, if applicable, end of follow-up.                                                                                   | 7            | "reference date: August 2012, 21 <sup>st</sup> "                                                                                                                                                                                                                                                                                                                                                                                                                                                                                                                                                                                                                  |
| Participants              | 5a   | D;V            | Specify key elements of the study setting (e.g., primary care, secondary care, general population) including number and location of centres.                                                     | 7/8          | We included all "Prospective studies diagnosing pneumonia"                                                                                                                                                                                                                                                                                                                                                                                                                                                                                                                                                                                                        |
|                           | 5b   | D;V            | Describe eligibility criteria for participants.                                                                                                                                                  | 7/8          | "(a) were at least 18 years old; (b) presented through self-referral in primary care, ambulatory care or at an emergency department with an acute or worsened cough ( $\leq 28$ days of duration) or any other clinical presentation potentially caused by LRTI; (c) consulted for the first time for this disease episode; (d) were immunocompetent."                                                                                                                                                                                                                                                                                                            |
|                           | 5c   | D;V            | Give details of treatments received, if relevant.                                                                                                                                                | NA           | NA                                                                                                                                                                                                                                                                                                                                                                                                                                                                                                                                                                                                                                                                |
| Outcome                   | 6a   | D;V            | Clearly define the outcome that is predicted by the prediction model, including how and when assessed.                                                                                           | 8            | "Eligible studies should have recorded clinical S&S and verified the disease status by CXR [21] or other imaging techniques."                                                                                                                                                                                                                                                                                                                                                                                                                                                                                                                                     |
|                           | 6b   | D;V            | Report any actions to blind assessment of the outcome to be predicted.                                                                                                                           | NA (19/S2)   | NA for this meta-analytic approach. Blinding of outcome assessment of original development studies is described in discussion: "in most studies the CXR was review by a second blinded radiologist to minimize inter-observer variability [17,19,30,31,33,34]." See also S2 for quality assessment.                                                                                                                                                                                                                                                                                                                                                               |
| Predictors                | 7a   | D;V            | Clearly define all predictors used in developing or validating the                                                                                                                               | 9/10         | "The prediction models included [...] one model [Table 1 and S3 Table]"                                                                                                                                                                                                                                                                                                                                                                                                                                                                                                                                                                                           |

|                              |     |     |                                                                                                                                                                                                       |                  |                                                                                                                                                                                                  |
|------------------------------|-----|-----|-------------------------------------------------------------------------------------------------------------------------------------------------------------------------------------------------------|------------------|--------------------------------------------------------------------------------------------------------------------------------------------------------------------------------------------------|
|                              |     |     | multivariable prediction model, including how and when they were measured.                                                                                                                            |                  |                                                                                                                                                                                                  |
|                              | 7b  | D;V | Report any actions to blind assessment of predictors for the outcome and other predictors.                                                                                                            | NA (S2)          | Not described in detail. Is part of the QUADAS-2 quality assessment (Supporting Information S2)                                                                                                  |
| Sample size                  | 8   | D;V | Explain how the study size was arrived at.                                                                                                                                                            | 7/10/11          | Method section: "IPD for model validation [...] the Cochrane Library (S1 Appendix)."<br>Result section: "Eighteen of the 3676 [...] eight studies (N=5308) were included [17,19,30,31,33-36]."   |
| Missing data                 | 9   | D;V | Describe how missing data were handled (e.g., complete-case analysis, single imputation, multiple imputation) with details of any imputation method.                                                  | 8                | "Missing values in IPD [...] the models validated."                                                                                                                                              |
| Statistical analysis methods | 10a | D   | Describe how predictors were handled in the analyses.                                                                                                                                                 | NA               | NA                                                                                                                                                                                               |
|                              | 10b | D   | Specify type of model, all model-building procedures (including any predictor selection), and method for internal validation.                                                                         | NA               | NA                                                                                                                                                                                               |
|                              | 10c | V   | For validation, describe how the predictions were calculated.                                                                                                                                         | 8                | "Pooled AUC was quantified [...] AUC estimates [26]", ". The dAUC [...] within an IPD dataset.", Calibration of included prediction models [...] external validation process."                   |
|                              | 10d | D;V | Specify all measures used to assess model performance and, if relevant, to compare multiple models.                                                                                                   | 8/9              | The performance of included prediction [...] in this group of patients."                                                                                                                         |
|                              | 10e | V   | Describe any model updating (e.g., recalibration) arising from the validation, if done.                                                                                                               | NA               | NA                                                                                                                                                                                               |
| Risk groups                  | 11  | D;V | Provide details on how risk groups were created, if done.                                                                                                                                             | 9                | "Risk groups with a low (0-10%) predicted risk of pneumonia, an intermediate risk (10-30%) and a high risk (30-100%) were defined."                                                              |
| Development vs. validation   | 12  | V   | For validation, identify any differences from the development data in setting, eligibility criteria, outcome, and predictors.                                                                         | 12               | Difference in setting, outcome and predictors are described in Table 2.                                                                                                                          |
| <b>Results</b>               |     |     |                                                                                                                                                                                                       |                  |                                                                                                                                                                                                  |
| Participants                 | 13a | D;V | Describe the flow of participants through the study, including the number of participants with and without the outcome and, if applicable, a summary of the follow-up time. A diagram may be helpful. | 11/Fig 1/Table 1 | Overview of selection of IPD: Figure 1<br>Participants: "The study by van Vugt et al. contained 55% [...] ranged from 5% to 43%", Table 2                                                        |
|                              | 13b | D;V | Describe the characteristics of the participants (basic demographics, clinical features, available predictors), including the number of participants with missing data for predictors and outcome.    | 11               | "Of the eight included studies [...] the outcome pneumonia."                                                                                                                                     |
|                              | 13c | V   | For validation, show a comparison with the development data of the distribution of important variables (demographics, predictors and outcome).                                                        | Table 1          | Table 1 shows the comparison of most of the characteristics the development data and the IPD used. No formal comparison of characteristics is made due to number of studies and models included. |
| Model development            | 14a | D   | Specify the number of participants and outcome events in each analysis.                                                                                                                               | NA               | NA                                                                                                                                                                                               |
|                              | 14b | D   | If done, report the unadjusted association between each candidate predictor and outcome.                                                                                                              | NA               | NA                                                                                                                                                                                               |
| Model specification          | 15a | D   | Present the full prediction model to allow predictions for individuals (i.e., all regression coefficients, and model intercept or baseline survival at a given time point).                           | NA               | NA                                                                                                                                                                                               |
|                              | 15b | D   | Explain how to use the prediction model.                                                                                                                                                              | NA               | NA                                                                                                                                                                                               |
| Model performance            | 16  | D;V | Report performance measures (with CIs) for the prediction model.                                                                                                                                      | 13/14            | Reported                                                                                                                                                                                         |
| Model-updating               | 17  | V   | If done, report the results from any model updating (i.e., model specification, model performance).                                                                                                   | NA               | NA                                                                                                                                                                                               |
| <b>Discussion</b>            |     |     |                                                                                                                                                                                                       |                  |                                                                                                                                                                                                  |
| Limitations                  | 18  | D;V | Discuss any limitations of the study (such as nonrepresentative sample, few events per predictor, missing data).                                                                                      | 20               | "A potential limitation [...] with the primary aim of our study."                                                                                                                                |

|                           |     |     |                                                                                                                                                |                   |                                                                                                                             |
|---------------------------|-----|-----|------------------------------------------------------------------------------------------------------------------------------------------------|-------------------|-----------------------------------------------------------------------------------------------------------------------------|
| Interpretation            | 19a | V   | For validation, discuss the results with reference to performance in the development data, and any other validation data.                      | 17/18/Table 3     | "It is common that performance [...] be validated in these dataset"                                                         |
|                           | 19b | D;V | Give an overall interpretation of the results, considering objectives, limitations, results from similar studies, and other relevant evidence. | 17                | "It is common that performance [...]second blinded radiologist to minimize inter-observer variability [17,19,30,31,33,34]." |
| Implications              | 20  | D;V | Discuss the potential clinical use of the model and implications for future research.                                                          | 16                | "Prediction models can [...] use in primary care."                                                                          |
| <b>Other information</b>  |     |     |                                                                                                                                                |                   |                                                                                                                             |
| Supplementary information | 21  | D;V | Provide information about the availability of supplementary resources, such as study protocol, Web calculator, and data sets.                  | Supplements S1-S5 | NA                                                                                                                          |
| Funding                   | 22  | D;V | Give the source of funding and the role of the funders for the present study.                                                                  | 25                | "No direct funding [...] manuscript."                                                                                       |

\*Items relevant only to the development of a prediction model are denoted by D, items relating solely to a validation of a prediction model are denoted by V, and items relating to both are denoted D;V. We recommend using the TRIPOD Checklist in conjunction with the TRIPOD Explanation and Elaboration document.
