# Supplementary material for: External Validation of Prediction Models for Pneumonia in Primary Care Patients with Lower Respiratory Tract Infection: An Individual Patient Data Meta-Analysis
Source: PubMed Central journal article supplement (PMC4769284; doi:10.1371/journal.pone.0149895), 2016-02-26
Supplement: pone.0149895.s004.pdf [file pone.0149895.s004.pdf]

**S1 Table. Overview of methodological quality of included validation datasets according to QUADAS-2 assessment [24].**

| <b>Dataset</b>    | <b>Risk of bias</b>      |                   |                           |                        | <b>Applicability concerns</b> |                   |                           |
|-------------------|--------------------------|-------------------|---------------------------|------------------------|-------------------------------|-------------------|---------------------------|
|                   | <i>Patient selection</i> | <i>Index test</i> | <i>Reference standard</i> | <i>Flow and timing</i> | <i>Patient selection</i>      | <i>Index test</i> | <i>Reference standard</i> |
| Melbye et al.     | ±                        | +                 | +                         | –                      | ±                             | +                 | +                         |
| Hopstaken et al.  | +                        | +                 | +                         | +                      | +                             | +                 | +                         |
| Flanders et al.   | ±                        | +                 | +                         | –                      | ±                             | +                 | +                         |
| Graffelman et al. | +                        | +                 | +                         | +                      | ±                             | +                 | +                         |
| Holm et al.       | +                        | +                 | +                         | +                      | +                             | +                 | +                         |
| Rainer et al.     | +                        | +                 | +                         | +                      | –                             | +                 | +                         |
| Steurer et al.    | +                        | +                 | +                         | +                      | +                             | +                 | +                         |
| Van Vugt et al.   | +                        | +                 | +                         | ±                      | +                             | +                 | +                         |

“+” = Low risk, “±” = Intermediate risk, “–” = High risk
