# Supplementary material for: External Validation of Prediction Models for Pneumonia in Primary Care Patients with Lower Respiratory Tract Infection: An Individual Patient Data Meta-Analysis
Source: PubMed Central journal article supplement (PMC4769284; doi:10.1371/journal.pone.0149895), 2016-02-26
Supplement: pone.0149895.s005.pdf [file pone.0149895.s005.pdf]

**S2 Table. Prediction rules of included diagnostic models for pneumonia in primary care.**

| <b>Model</b>                                                                                                                                                                                                                                                         | <b>Predictors, N=</b> | <b>Predicted probability of pneumonia given by: <math>1/(1+e^{-y})</math></b>                                                                                                                                                                                      |
|----------------------------------------------------------------------------------------------------------------------------------------------------------------------------------------------------------------------------------------------------------------------|-----------------------|--------------------------------------------------------------------------------------------------------------------------------------------------------------------------------------------------------------------------------------------------------------------|
| Diehr '84 [31]*                                                                                                                                                                                                                                                      | 6                     | $y = -2 \times \text{Coryza} + 1 \times \text{Night sweats}^2 + 1 \times \text{Myalgia} + 1 \times \text{Phlegm} + 2 \times \text{Respiratory rate} > 25^3 + 2 \times \text{Temperature} > 37.78^\circ$                                                            |
| Singal '89 [34]                                                                                                                                                                                                                                                      | 3                     | $y = -3.095 + 1.214 \times \text{Cough}^1 + 1.007 \times \text{Temperature} > 37.78^\circ + 0.823 \times \text{Crackles}$                                                                                                                                          |
| Heckerling '90 [18]                                                                                                                                                                                                                                                  | 5                     | $y = -1.705 + 0.494 \times \text{Temperature} > 37.8^\circ + 0.428 \times \text{Pulse} > 100 + 0.658 \times \text{Crackles} + 0.638 \times \text{Diminished breath sound} + 0.691 \times \text{Absence of asthma}$                                                 |
| Melbye '92 [33]*                                                                                                                                                                                                                                                     | 6                     | $y = 4.7 \times \text{Fever (symptom) \& Dur. illness} \geq 1 \text{ week} - 4.5 \times \text{Coryza} - 2.1 \times \text{Sore throat} + 5.0 \times \text{Dyspnea, very annoying}^1 + 8.2 \times \text{Chest pain, strong, lateral}^1 + 0.9 \times \text{Crackles}$ |
| Hopstaken '03 [32]                                                                                                                                                                                                                                                   | 3                     | $y = -2.74 + 1.02 \times \text{Dry cough}^1 + 1.78 \times \text{Diarrhea} + 1.13 \times \text{Temperature} \geq 38^\circ$                                                                                                                                          |
| van Vugt '13 [19]                                                                                                                                                                                                                                                    | 6                     | $y = -3.984 + 0.446 \times \text{Dyspnea} + 0.698 \times \text{Absence of coryza} + 0.596 \times \text{Diminished breath sounds} + 1.404 \times \text{Crackles} + 0.961 \times \text{Pulse} > 100 + 0.980 \times \text{Temperature} > 37.8^\circ$                  |
| <sup>1</sup> If available (otherwise unspecified type of predictor used), <sup>2</sup> If available (otherwise "unspecified sweating", used), <sup>3</sup> In the data of Hopstaken et al. a respiratory rate >20 is used, *model does not incorporate an intercept. |                       |                                                                                                                                                                                                                                                                    |
