# Supplementary material for: External Validation of Prediction Models for Pneumonia in Primary Care Patients with Lower Respiratory Tract Infection: An Individual Patient Data Meta-Analysis
Source: PubMed Central journal article supplement (PMC4769284; doi:10.1371/journal.pone.0149895), 2016-02-26
Supplement: pone.0149895.s006.pdf [file pone.0149895.s006.pdf]

**S3 Table. In- and exclusion criteria of all model development studies and studies contributing IPD.**

| Study                  | Model | Dataset | Setting | Selection criteria                                                          |                                                                                                                           |
|------------------------|-------|---------|---------|-----------------------------------------------------------------------------|---------------------------------------------------------------------------------------------------------------------------|
|                        |       |         |         | Inclusion                                                                   | Exclusion                                                                                                                 |
| Diehr et al. [31]      | •     |         | ED      | Adults, walk-ins, cough <1m                                                 | Pulse >160/m, temp >104°F, SBP <90 mmHg, previous consultation, pregnancy                                                 |
| Singal et al. [34]     | •     |         | ED      | Adults, CXR request                                                         |                                                                                                                           |
| Heckerling et al. [18] | •     |         | ED      | Adults, fever or respir. symp., CXR performed                               | Pre-test (CXR) prob. Of pneumonia by physician = 0, previous consultation                                                 |
| Melbye et al. [33]     | •     | •       | OHD     | Adults, walk-ins between 16-21h, symp. of respir. tract or throat infection | Pregnancy, severe dyspnea                                                                                                 |
| Hopstaken et al. [32]  | •     | •       | GP      | Adults, cough <1m, combination of clinical symptoms                         | Pregnancy, lactation, other severe disease, ABx treatment <14d, hospitalization <4w for resp. dis., previous consultation |
| van Vugt et al. [19]   | •     | •       | GP      | Adults, acute cough <4w, suspected of LTRI, immunocompetent                 | pregnancy, previous consultation, ABx <1m                                                                                 |
| Flanders et al. [35]   |       | •       | ED/AC   | Adults, cough <3w                                                           | Pregnancy, syst. inflam. disorder, coexisting infect., MI, cancer, immunosupr. disorder, previous consultation            |
| Graffelman et al. [17] |       | •       | GP      | Adults, set of clinical symptoms suggestive of LTRI                         | Pregnancy, cancer                                                                                                         |
| Holm et al. [36]       |       | •       | GP      | Adults, diagnosis of LTRI                                                   | Hospitalization <1w, illness requiring hospitalization, pregnancy                                                         |
| Rainer et al. [37]     |       | •       | ED      | Adults, walk-ins, febrile resp. illness                                     |                                                                                                                           |

|                                                                                                                                                                                                                                                         |  |   |        |                                              |                                                                                       |
|---------------------------------------------------------------------------------------------------------------------------------------------------------------------------------------------------------------------------------------------------------|--|---|--------|----------------------------------------------|---------------------------------------------------------------------------------------|
| Steurer et al. [38]                                                                                                                                                                                                                                     |  | • | GP, ED | Adults, new or worsened cough<br>>24h, fever | Chronic lung disease, cough after<br>hospitalization, pregnancy,<br>immunocompromised |
| <p>ABx=Antibiotics, AC=Ambulatory Clinic, CXR=Chest X-radiography, ED=Emergency Department, GP=General Practitioner,<br/>LRTI=Lower respiratory tract infection, MI=Myocardial infarction, OHD=Out of Hours Department, SBP=Systolic blood pressure</p> |  |   |        |                                              |                                                                                       |
