# Supplementary material for: External Validation of Prediction Models for Pneumonia in Primary Care Patients with Lower Respiratory Tract Infection: An Individual Patient Data Meta-Analysis
Source: PubMed Central journal article supplement (PMC4769284; doi:10.1371/journal.pone.0149895), 2016-02-26
Supplement: pone.0149895.s007.pdf [file pone.0149895.s007.pdf]

**S4 Table. Relative discriminative performance of pneumonia prediction models within datasets, measured as delta AUC.** Numbers depict the difference of individual model's AUC to the average AUC of the dataset.

| Model             | Validation dataset |                  |                 |                   |             |               |                |                 |
|-------------------|--------------------|------------------|-----------------|-------------------|-------------|---------------|----------------|-----------------|
|                   | Melbye et al.      | Hopstaken et al. | Flanders et al. | Graffelman et al. | Holm et al. | Rainer et al. | Steurer et al. | Van Vugt et al. |
| Van Vugt et al.   | <b>0,06</b>        | X                | <b>0,14</b>     | 0,01              | X           | X             | X              | D               |
| Heckerling et al. | -0,03              | X                | 0,13            | 0,03              | X           | X             | X              | <b>0,04</b>     |
| Diehr et al.      | X                  | -0,02            | 0,00            | X                 | X           | <b>0,07</b>   | X              | X               |
| Singal et al.     | -0,04              | <b>0,03</b>      | 0,05            | <b>0,04</b>       | NA          | X             | NA             | 0,02            |
| Melbye et al.     | D                  | -0,01            | -0,14           | -0,10             | X           | X             | X              | X               |
| Hopstaken et al.  | X                  | D                | -0,17           | 0,02              | X           | -0,07         | X              | -0,06           |

NA = single validation within dataset, dAUC calculated, X = Model not validated in dataset due to missing predictors, D = Development dataset, dAUC not calculated.
